# Supplementary material for: Identification of Drought Tolerant Mechanisms in Maize Seedlings Based on Transcriptome Analysis of Recombination Inbred Lines
Source: Front Plant Sci. 2016 Jul 26;7:1080. doi: 10.3389/fpls.2016.01080 (PMC4961006; doi:10.3389/fpls.2016.01080)
Supplement: Supplementary file 16 [file Table7.xlsx]

## Sheet: Sheet1
	Supplemental Table S7. Maize drought stress gene expression for oxidation reduction related genes. Annotation source: Zea mays (MaizeSequence.org), Oryza sativa (Rice Genome Annotation Project), Arabidopsis thaliana (TAIR). The extent of differential expression is measured in terms of log2FoldChange change and hypen(-) indicates failure to meet the significance cutoff or undetected. Values in red…
Stress stage	Gene Product Category	Gene	Annotation	RIL70(log2FoldChange)	RIL93(log2FoldChange)
DT2	Peroxidase superfamily	GRMZM5G850924	Peroxidase superfamily protein	1.8517	2.4901
		GRMZM2G080183	Peroxidase superfamily protein	-	1.6519
		GRMZM2G122816	Peroxidase superfamily protein	-	1.8926
		GRMZM2G160327	Peroxidase superfamily protein	-	-3.5627
		GRMZM2G427815	Peroxidase superfamily protein	-	-3.3346
		AC205413.4_FG001	Peroxidase superfamily protein	-	1.3362
		GRMZM2G000107	Peroxidase superfamily protein	-	2.4173
		GRMZM2G061088	Peroxidase superfamily protein	-	1.1307
		GRMZM2G108123	Peroxidase superfamily protein	-	2.8217
		GRMZM2G177792	Peroxidase superfamily protein	-	2.9142
		GRMZM2G043954	Plant peroxidase	-	1.372
	GST	GRMZM2G146475	glutathione S-transferase TAU 8	-	-1.9114
		GRMZM2G416632	glutathione S-transferase TAU 7	-	1.5577
		GRMZM2G335618	glutathione S-transferase TAU 25	-	1.6406
	others	GRMZM2G179147	cytochrome P450, family 707, subfamily A, polypeptide 1	1.6492	-
		GRMZM2G152975	GroES-like zinc-binding dehydrogenase family protein	-1.6431	-
		GRMZM2G344911	Short-chain dehydrogenase	-1.6992	-
		GRMZM2G316789	Short-chain dehydrogenase	-1.6677	-
		GRMZM2G118610	cinnamyl alcohol dehydrogenase 6	-1.58	-
		GRMZM2G152801	flavonol synthase 1	-3.3081	-
		GRMZM2G090733	beta-ketoacyl reductase 1	-1.8525	-
		AC203754.4_FG008	delta 1-pyrroline-5-carboxylate synthase 2	-	2.2748
		GRMZM2G114988	cytochrome P450, family 81, subfamily D, polypeptide 4	-	1.7189
		GRMZM2G176903	keto reductase family protein	-	1.6225
		GRMZM2G128114	Aldehyde dehydrogenase	-	1.5092
		GRMZM2G178533	NAD(P)-linked oxidoreductase superfamily protein	-	1.6451
		GRMZM2G011919	SOS3-interacting protein 1	-	-2.931
		GRMZM2G129453	Fatty acid/sphingolipid desaturase	-	-2.1069
		GRMZM2G074401	fatty acid desaturase 8	-	-1.8516
		GRMZM2G139689	L-aspartate oxidase	-	-1.4206
		GRMZM2G404443	cytokinin oxidase/dehydrogenase 6	-	-3.0027
		GRMZM2G114234	Erv1/Alr family protein	-	-1.3015
		GRMZM2G176129	inorganic carbon transport protein-related	-	-1.6201
		GRMZM2G105604	urophorphyrin methylase 1	-	-1.4654
		GRMZM2G129209	fatty acid desaturase 8	-	-2.0857
		GRMZM5G852502	Plant stearoyl-acyl-carrier-protein desaturase family protein	-	-1.3723
		GRMZM2G016236	NAD(P)-linked oxidoreductase superfamily protein	-	-1.3885
		GRMZM2G070508	cytochrome P450, family 711, subfamily A, polypeptide 1	-	-2.2773
		GRMZM5G870342	Coproporphyrinogen III oxidase	-	-1.3397
		GRMZM2G167336	cytochrome P450, family 93, subfamily D, polypeptide 1	-	-3.4834
DT5	Peroxidase superfamily	AC210003.2_FG004	Peroxidase superfamily protein	-1.7257	-
		GRMZM2G122816	Peroxidase superfamily protein	-	1.9854
		GRMZM2G070603	Peroxidase superfamily protein	-	-6.8014
		Novel01132	Plant peroxidase superfamily protein	-	4.7419
		GRMZM2G108153	Peroxidase superfamily protein	1.0225	3.1875
		GRMZM2G126261	Peroxidase superfamily protein	-	-1.0201
		GRMZM2G136042	Peroxidase superfamily protein	-	-3.0118
		GRMZM2G160327	Peroxidase superfamily protein	1.0149	-7.3231
		GRMZM2G320269	Peroxidase superfamily protein	-	-3.1735
		GRMZM2G365774	Peroxidase superfamily protein	-	-3.7866
		GRMZM2G427815	Peroxidase superfamily protein	-	-5.4554
		GRMZM2G104394	Peroxidase superfamily protein	2.5184	-
	GST	GRMZM2G032856	glutathione S-transferase TAU 8	1.2992	2.1709
		GRMZM2G146913	glutathione S-transferase TAU 18	1.8126	5.0445
		GRMZM2G434541	glutathione S-transferase TAU 15	-	3.3421
		GRMZM2G066369	glutathione S-transferase TAU 18	-	-2.086
		GRMZM2G077206	glutathione S-transferase family protein	-	-2.5144
		GRMZM2G096153	glutathione S-transferase F11	-	-1.3236
		GRMZM2G146475	glutathione S-transferase TAU 8	-	-1.5534
		GRMZM2G428168	glutathione S-transferase TAU 8	-	-1.0358
		GRMZM2G056388	glutathione S-transferase TAU 18	1.3891	-
	CAX	GRMZM2G088212	catalase 2, CAT2	-	1.0039
		GRMZM2G090568	catalase 2, CAT2	-	-1.6159
	Ascorbate Peroxidase	GRMZM2G006791	thylakoidal ascorbate peroxidase	-	-1.4107
		GRMZM2G156227	ascorbate peroxidase 4, APX4	-	-2.3397
	others	GRMZM2G070279	Short-chain dehydrogenase	1.6863	3.407
		GRMZM2G152981	GroES-like zinc-binding dehydrogenase family protein	2.0697	-1.0263
		GRMZM2G109056	lipoxygenase 1	1.632	1.1236
		GRMZM2G046669	2-oxoglutarate (2OG) and Fe(II)-dependent oxygenase superfamily protein	-1.7825	Inf
		GRMZM2G000739	urophorphyrin methylase 1	-1.8877	-
		GRMZM2G363429	cytochrome P450, family 722, subfamily A, polypeptide 1	-1.5852	-2.7151
		GRMZM2G139689	L-aspartate oxidase	-1.261	-2.9224
		GRMZM2G136712	aspartate kinase-homoserine dehydrogenase i	-1.6084	-1.3844
		GRMZM2G563190	NAD(P)H dehydrogenase B3	-	-6.3849
		GRMZM2G404443	cytokinin oxidase/dehydrogenase 6	-	-5.8028
		GRMZM2G011919	SOS3-interacting protein 1	-	-5.6375
		GRMZM2G167336	cytochrome P450, family 93, subfamily D, polypeptide 1	-	-5.5662
		GRMZM2G098346	alcohol dehydrogenase 1	-	-3.9482
		GRMZM2G354558	fatty acid desaturase 8	-	-3.8661
		GRMZM2G044247	Dihydrodipicolinate reductase, bacterial/plant	-	-3.8261
		AC210013.4_FG006	NAD(P)-binding Rossmann-fold superfamily protein	-	-3.7553
		GRMZM2G132489	YUCCA 3	-	-3.745
		GRMZM2G337113	Erythrose phosphate dehydrogenase	-	-3.7246
		GRMZM2G129209	fatty acid desaturase 8	-	-3.6106
		GRMZM2G143625	Plant stearoyl-acyl-carrier-protein desaturase family protein	-	-3.5019
		GRMZM2G004128	FAD/NAD(P)-binding oxidoreductase family protein	-	-3.3762
		GRMZM2G167220	cytokinin oxidase/dehydrogenase 1	-	-3.2694
		GRMZM2G129453	Fatty acid/sphingolipid desaturase	-	-3.2604
		GRMZM2G099642	Zinc-binding dehydrogenase family protein	-	-3.2397
		GRMZM2G135029	FAD/NAD(P)-binding oxidoreductase family protein	-	-3.2259
		GRMZM2G178917	Cyclopropane-fatty-acyl-phospholipid synthase	-	-3.2123
		GRMZM2G079759	rubredoxin family protein	-	-2.9837
		GRMZM5G874448	NADH dehydrogenase family protein	-	-2.9714
		GRMZM2G139689	L-aspartate oxidase	-	-2.9224
		GRMZM2G059083	ferredoxin-NADP(+)-oxidoreductase 1	-	-2.8683
		GRMZM2G409133	Oxidoreductase family protein	-	-2.7968
		GRMZM2G413647	6-phosphogluconate dehydrogenase family protein	-	-2.7919
		GRMZM5G852502	Plant stearoyl-acyl-carrier-protein desaturase family protein	-	-2.7696
		GRMZM5G854533	chloroplast thylakoid lumen protein	-	-2.767
		GRMZM2G106748	PLAT/LH2 domain-containing lipoxygenase family protein	-	-2.7628
		GRMZM2G026322	cytochrome P450, family 709, subfamily B, polypeptide 2	-	-2.7365
		GRMZM2G179521	glucose-6-phosphate dehydrogenase 2	-	-2.7229
		GRMZM2G363429	cytochrome P450, family 722, subfamily A, polypeptide 1	-	-2.7151
		GRMZM2G176129	inorganic carbon transport protein-related	-	-2.7004
		GRMZM2G036708	cysteine synthase C1	-	-2.6421
		GRMZM2G164036	cytochrome P450, family 71, subfamily A, polypeptide 25	-	-2.6255
		GRMZM2G051753	HCO3- transporter family	-	-2.6227
		GRMZM2G027219	non-photochemical quenching 1	-	-2.6084
		AC203535.4_FG004	Rieske (2Fe-2S) domain-containing protein	-	-2.594
		GRMZM2G084407	cytochrome P450, family 709, subfamily B, polypeptide 2	-	-2.5307
		GRMZM2G152258	NAD(P)-binding Rossmann-fold superfamily protein	-	-2.5279
		GRMZM2G006277	chloroplast precursor	-	-2.5221
		GRMZM2G168143	ferredoxin-NADP(+)-oxidoreductase 1	-	-2.4973
		GRMZM2G106588	Flavin-binding monooxygenase family protein	-	-2.4783
		GRMZM2G016236	NAD(P)-linked oxidoreductase superfamily protein	-	-2.4722
		GRMZM2G107199	Cytochrome P450 superfamily protein	-	-2.414
		GRMZM2G091456	squalene epoxidase 2	-	-2.3751
		GRMZM2G038964	fatty acid hydroxylase 1	-	-2.3682
		GRMZM2G080044	NAD(P)H dehydrogenase C1	-	-2.2954
		GRMZM2G459563	cytochrome P450, family 709, subfamily B, polypeptide 2	-	-2.2911
		GRMZM2G125268	aldehyde dehydrogenase 2B4	-	-2.2448
		GRMZM2G078373	fatty acid desaturase family protein	-	-2.1854
		GRMZM2G335564	NAD(P)H dehydrogenase subunit H	-	-2.1244
		GRMZM2G122793	ferredoxin thioredoxin reductase catalytic beta chain family protein	-	-2.0987
		GRMZM2G074401	fatty acid desaturase 8	-	-2.0914
		GRMZM2G059191	ferredoxin-NADP(+)-oxidoreductase 1	-	-2.0562
		GRMZM2G180399	Plant stearoyl-acyl-carrier-protein desaturase family protein	-	-2.0173
		GRMZM2G105604	urophorphyrin methylase 1	-	-2.008
		GRMZM2G129513	lactate/malate dehydrogenase family protein	-	-2.0043
		GRMZM2G036290	1-deoxy-D-xylulose 5-phosphate reductoisomerase	-	-1.9691
		GRMZM2G058261	FAD/NAD(P)-binding oxidoreductase family protein	-	-1.8686
		GRMZM2G085153	NAD(P)-linked oxidoreductase superfamily protein	-	-1.861
		GRMZM2G087254	APS reductase 3	-	-1.8415
		GRMZM5G851051	inorganic carbon transport protein-related	-	-1.8194
		GRMZM2G150248	polyamine oxidase 4	-	-1.8147
		GRMZM2G444541	NADH dehydrogenase family protein	-	-1.8137
		GRMZM2G117956	Methylenetetrahydrofolate reductase family protein	-	-1.7704
		GRMZM2G158437	NAD(P)-linked oxidoreductase superfamily protein	-	-1.7458
		GRMZM2G052036	unknown protei	-	-1.7228
		GRMZM2G098423	D-3-phosphoglycerate dehydrogenase	-	-1.6935
		GRMZM2G048121	NAD(P)-linked oxidoreductase superfamily protein	-	-1.6868
		GRMZM2G143202	Cytochrome P450 superfamily protein	-	-1.6836
		GRMZM2G397247	Aldolase superfamily protein	-	-1.6677
		GRMZM2G072744	peroxisomal NAD-malate dehydrogenase 1	-	-1.6463
		GRMZM2G109244	subunit NDH-M of NAD(P)H:plastoquinone dehydrogenase complex	-	-1.6189
		GRMZM2G169005	NAD(P)-binding Rossmann-fold superfamily protein	-	-1.6022
		GRMZM2G018037	NAD(P)-binding Rossmann-fold superfamily protein	-	-1.5742
		GRMZM2G058675	aldehyde dehydrogenase 2B7	-	-1.5678
		GRMZM2G155546	Ferritin/ribonucleotide reductase-like family protein	-	-1.5191
		GRMZM2G090338	sulfite reductase	-	-1.5084
		GRMZM2G073351	protochlorophyllide oxidoreductase A	-	-1.4817
		GRMZM2G128146	NAD(P)-binding Rossmann-fold superfamily protein	-	-1.4758
		GRMZM2G043277	Plant haem oxygenase (decyclizing) family protein	-	-1.4515
		GRMZM2G415359	Lactate/malate dehydrogenase family protein	-	-1.4464
		GRMZM2G040728	cytochrome P450, family 94, subfamily D, polypeptide 2	-	-1.436
		GRMZM2G035073	Cytochrome P450 superfamily protein	-	-1.4339
		GRMZM2G114234	Erv1/Alr family protein	-	-1.3923
		GRMZM5G837869	cytochrome P450, family 97, subfamily A, polypeptide 3	-	-1.3778
		GRMZM2G128935	Oxidoreductase, zinc-binding dehydrogenase family protein	-	-1.3759
		GRMZM2G105436	Radical SAM superfamily protein	-	-1.3698
		GRMZM2G424491	cytochrome c biogenesis protein family	-	-1.3696
		GRMZM2G070508	cytochrome P450, family 711, subfamily A, polypeptide 1	-	-1.3515
		GRMZM5G870342	Coproporphyrinogen III oxidase	-	-1.3508
		GRMZM5G810393	cytochrome P450, family 94, subfamily D, polypeptide 2	-	-1.3492
		GRMZM2G349062	ACD1-like	-	-1.3477
		GRMZM2G320307	monodehydroascorbate reductase 4	-	-1.3342
		GRMZM2G115805	FMN-linked oxidoreductases superfamily protein	-	-1.3108
		GRMZM2G104310	glycine decarboxylase P-protein 1	-	-1.3079
		GRMZM2G080650	Zinc-binding dehydrogenase family protein	-	-1.301
		GRMZM2G003814	Polyketide synthase, enoylreductase family protein	-	-1.2956
		GRMZM2G053315	flavin-dependent monooxygenase 1	-	-1.2868
		GRMZM5G800096	NADH-Ubiquinone/plastoquinone (complex I) protein	-	-1.2842
		GRMZM2G320099	Cytidine/deoxycytidylate deaminase family protein	-	-1.2797
		GRMZM5G822593	lipoxygenase 2	-	-1.2749
		GRMZM2G441444	Protoporphyrinogen oxidase	-	-1.2471
		GRMZM2G052544	Homeodomain-like superfamily protein	-	-1.2261
		GRMZM2G082185	O-acetylserine (thiol) lyase isoform C	-	-1.2228
		GRMZM2G034120	Protein of unknown function (DUF399 and DUF3411)	-	-1.2188
		GRMZM2G014580	cytochrome P450, family 71, subfamily A, polypeptide 25	-	-1.1857
		GRMZM2G101004	Haem oxygenase	-	-1.1841
		GRMZM2G022130	NAD(P)-linked oxidoreductase superfamily protein	-	-1.1793
		GRMZM2G063258	NAD-dependent glycerol-3-phosphate dehydrogenase family protein	-	-1.1611
		GRMZM2G440208	6-phosphogluconate dehydrogenase family protein	-	-1.1437
		GRMZM2G012391	Cytochrome P450 superfamily protein	-	-1.1252
		GRMZM2G133720	cytochrome P450, family 71, subfamily A, polypeptide 25	-	-1.1151
		GRMZM2G058760	root FNR 1	-	-1.114
		GRMZM2G129246	Aldolase-type TIM barrel family protein	-	-1.0967
		GRMZM2G173628	Fe superoxide dismutase 3	-	-1.0686
		GRMZM2G058584	histidinol dehydrogenase	-	-1.0661
		GRMZM2G114739	sulfite oxidase	-	-1.0612
		GRMZM5G861678	phytochromobilin:ferredoxin oxidoreductase, chloroplast / phytochromobilin synthase (HY2)	-	-1.0474
		GRMZM5G891739	copper/zinc superoxide dismutase 3	-	-1.0108
		GRMZM2G137409	4-hydroxy-3-methylbut-2-enyl diphosphate synthase	-	-1.0018
		AC215690.3_FG002	Plant stearoyl-acyl-carrier-protein desaturase family protein	-	1.0576
		GRMZM2G441541	Riboflavin synthase-like beta-barrel	-	1.0633
		GRMZM2G022947	cytochrome P450, family 72, subfamily A, polypeptide 8	-	1.0715
		GRMZM2G015419	lipoxygenase 2	-	1.0782
		GRMZM2G057910	NAD(P)-binding Rossmann-fold superfamily protein	-	1.0941
		GRMZM2G124455	manganese superoxide dismutase 1	-	1.0969
		GRMZM2G141607	NAD(P)-binding Rossmann-fold superfamily protein	-	1.113
		GRMZM2G109056	lipoxygenase 1	-	1.1236
		GRMZM2G053458	unknown protei	-	1.1377
		GRMZM2G178533	NAD(P)-linked oxidoreductase superfamily protein	-	1.138
		GRMZM2G169890	copper/zinc superoxide dismutase 1	-	1.1883
		GRMZM2G140817	cytochrome P450, family 98, subfamily A, polypeptide 3	-	1.1904
		GRMZM2G099467	2-oxoglutarate (2OG) and Fe(II)-dependent oxygenase superfamily protein	-	1.2009
		GRMZM2G088601	phytoene desaturase 3	-	1.2362
		GRMZM2G019515	Flavin-containing monooxygenase family protein	-	1.243
		GRMZM2G048616	Aldolase-type TIM barrel family protein	-	1.2916
		GRMZM2G099666	acyl-CoA oxidase 2	-	1.3367
		GRMZM2G159724	NADP-malic enzyme 3	-	1.3537
		GRMZM2G431288	Cytochrome P450 superfamily protein	-	1.3669
		GRMZM2G147701	NAD(P)-binding Rossmann-fold superfamily protein	-	1.3681
		GRMZM2G005107	short-chain dehydrogenase-reductase B	-	1.4209
		GRMZM2G432128	cytosolic NADP+-dependent isocitrate dehydrogenase	-	1.5298
		AC207342.3_FG008	DCD (Development and Cell Death) domain protein	-	1.5302
		GRMZM2G169201	respiratory burst oxidase protein F	-	1.5956
		GRMZM2G426175	2-oxoglutarate (2OG) and Fe(II)-dependent oxygenase superfamily protein	-	1.6158
		GRMZM2G104843	lipoxygenase 3	-	1.6191
		GRMZM2G448185	Riboflavin synthase-like superfamily protein	-	1.6481
		GRMZM2G169066	BRADI2G44160 Cytochrome P450	-	1.6784
		GRMZM2G103546	aldehyde dehydrogenase 3H1	-	1.6914
		GRMZM2G007249	ethylene-forming enzyme	-	1.6993
		GRMZM2G134708	monodehydroascorbate reductase 1	-	1.7007
		GRMZM2G044175	sphingoid base hydroxylase 2	-	1.703
		GRMZM2G176495	Calcium-dependent ARF-type GTPase activating protein family	-	1.7286
		GRMZM2G147966	Riboflavin synthase-like superfamily protein	-	1.7518
		GRMZM2G077054	NADH-dependent glutamate synthase 1	-	1.7534
		GRMZM2G017616	lipoxygenase 3	-	1.7754
		GRMZM2G130440	aldehyde dehydrogenase 7B4	-	1.7847
		GRMZM2G040095	PLAT/LH2 domain-containing lipoxygenase family protein	-	1.8175
		GRMZM2G059314	NAD(P)-linked oxidoreductase superfamily protein	-	1.8925
		GRMZM2G393337	hydroxy methylglutaryl CoA reductase 1	-	1.9119
		GRMZM2G090087	aldehyde dehydrogenase 12A1	-	1.9786
		GRMZM2G162527	NAD(P)-binding Rossmann-fold superfamily protein	-	1.9893
		GRMZM2G173195	6-phosphogluconate dehydrogenase family protein	-	2.0203
		GRMZM2G358831	BRADI4G25950 Cytochrome P450	-	2.027
		GRMZM2G354909	NAD(P)-binding Rossmann-fold superfamily protein	-	2.0275
		GRMZM2G087875	cytochrome P450, family 81, subfamily D, polypeptide 8	-	2.0487
		GRMZM2G030831	cytochrome P450, family 87, subfamily A, polypeptide 6	-	2.0579
		GRMZM2G161245	malate dehydrogenase	-	2.0801
		GRMZM2G181362	lysine-ketoglutarate reductase/saccharopine dehydrogenase bifunctional enzyme	-	2.119
		GRMZM2G002304	NAD(P)-binding Rossmann-fold superfamily protein	-	2.1776
		GRMZM2G176217	Small GTP-binding protein	-	2.2002
		GRMZM2G468855	NAD(P)-binding Rossmann-fold superfamily protein	-	2.22
		GRMZM2G442658	alcohol dehydrogenase 1	-	2.2415
		GRMZM2G050997	cytokinin oxidase/dehydrogenase 1	-	2.3135
		GRMZM2G074871	cytochrome P450, family 71 subfamily B, polypeptide 7	-	2.3206
		GRMZM2G001645	Hydroxymethylglutaryl-CoA reductase	-	2.3287
		GRMZM2G089259	Seven transmembrane MLO family protein	-	2.3827
		GRMZM2G097342	Protein of unknown function DUF4228	-	2.3963
		GRMZM2G092823	cytochrome p450 78a9	-	2.4071
		GRMZM2G031724	Arabidopsis thaliana gibberellin 2-oxidase 1	-	2.4128
		GRMZM2G166616	2-oxoglutarate (2OG) and Fe(II)-dependent oxygenase superfamily protein	-	2.4172
		GRMZM2G083526	Fatty acid hydroxylase superfamily	-	2.4931
		GRMZM2G066441	cytochrome P450, family 704, subfamily A, polypeptide 2	-	2.5117
		GRMZM2G009479	lipoxygenase 2	-	2.5703
		GRMZM2G065928	cytochrome P450, family 707, subfamily A, polypeptide 4	-	2.578
		GRMZM2G145972	NAD(P)H dehydrogenase B2	-	2.6201
		GRMZM2G350397	aldehyde dehydrogenase 10A9	-	2.6338
		GRMZM5G866027	cytochrome P450, family 709, subfamily B, polypeptide 1	-	2.6519
		GRMZM2G139512	Oxidoreductase, zinc-binding dehydrogenase family protein	-	2.6528
		GRMZM2G146754	aldehyde dehydrogenase 10A9	-	2.6744
		GRMZM2G375504	delta 1-pyrroline-5-carboxylate synthase 2	-	2.7224
		GRMZM2G106468	cytochrome P450, family 709, subfamily B, polypeptide 2	-	2.7477
		GRMZM2G109130	PLAT/LH2 domain-containing lipoxygenase family protein	-	2.7521
		GRMZM2G090747	6-phosphogluconate dehydrogenase family protein	-	2.829
		GRMZM2G176903	NADP-dependent oxidoreductase domain	-	2.929
		GRMZM5G891656	FAD/NAD(P)-binding oxidoreductase family protein	-	2.94
		GRMZM2G066578	Fatty acid hydroxylase superfamily	-	2.9838
		GRMZM2G167613	cinnamyl alcohol dehydrogenase 9	-	3.0037
		GRMZM2G177384	CYTOCHROME P450 51G1	-	3.073
		GRMZM2G104783	cytochrome P450, family 78, subfamily A, polypeptide 6	-	3.118
		GRMZM2G365483	aldehyde dehydrogenase 10A9	-	3.1515
		GRMZM2G128114	Aldehyde dehydrogenase	-	3.3037
		GRMZM2G074743	alternative oxidase 1A	-	3.3092
		GRMZM5G883417	Plant stearoyl-acyl-carrier-protein desaturase family protein	-	3.3808
		GRMZM2G070279	Glucose/ribitol dehydrogenase	-	3.407
		GRMZM2G061700	Protein of unknown function (DUF3537)	-	3.4604
		GRMZM2G168382	cytochrome P450, family 71, subfamily B, polypeptide 37	-	3.5334
		GRMZM2G058024	2-oxoglutarate (2OG) and Fe(II)-dependent oxygenase superfamily protein	-	3.5643
		GRMZM2G102760	lipoxygenase 1	-	3.5956
		GRMZM2G044636	cytochrome P450, family 72, subfamily A, polypeptide 9	-	3.6677
		GRMZM2G090051	beta-hydroxylase 1	-	3.6701
		GRMZM2G106650	cytochrome P450, family 71, subfamily A, polypeptide 25	-	3.7686
		GRMZM2G024476	cytokinin oxidase 5	-	3.8041
		GRMZM2G075461	cytochrome P450, family 709, subfamily B, polypeptide 2	-	3.8939
		GRMZM2G010468	cinnamate-4-hydroxylase	-	3.9123
		GRMZM2G067563	Protein of unknown function (DUF3537)	-	3.9875
		GRMZM5G817173	cytokinin oxidase 5	-	4.0891
		GRMZM2G061777	delta 1-pyrroline-5-carboxylate synthase 2	-	4.3315
		GRMZM2G168016	cytochrome P450, family 722, subfamily A, polypeptide 1	-	4.3741
		GRMZM2G396248	cytochrome P450, family 94, subfamily C, polypeptide 1	-	4.4274
		AC203754.4_FG008	delta 1-pyrroline-5-carboxylate synthase 2	-	4.588
		GRMZM2G105954	cytochrome P450, family 707, subfamily A, polypeptide 4	-	4.6326
		GRMZM2G320786	laccase 14	-	4.7914
		GRMZM2G068682	SKU5 similar 12	-	4.9807
		GRMZM2G050234	2-oxoglutarate (2OG) and Fe(II)-dependent oxygenase superfamily protein	-	5.0756
		GRMZM2G159179	cytochrome P450, family 94, subfamily C, polypeptide 1	-	5.2032
		GRMZM2G424804	cytochrome P450, family 94, subfamily C, polypeptide 1	-	5.2739
		GRMZM2G169943	NAD(P)-linked oxidoreductase superfamily protein	-	5.6169
		GRMZM2G094309	delta 1-pyrroline-5-carboxylate synthase 2	-	5.722
		GRMZM2G169033	laccase 14	-	5.7264
		GRMZM2G062531	sterol-4alpha-methyl oxidase 1-1	-	6.4025
		GRMZM2G329029	cytochrome P450, family 93, subfamily D, polypeptide 1	-	6.5604
		GRMZM2G122654	ytochrome p450, family 71, subfamily B, polypeptide 11	-	6.5926
		GRMZM2G094375	laccase 7	-	7.0092
		GRMZM2G028535	delta 1-pyrroline-5-carboxylate synthase 2	-	7.1112
		GRMZM2G118770	NADP-malic enzyme 1	-	7.162
		GRMZM2G117246	2-oxoglutarate (2OG) and Fe(II)-dependent oxygenase superfamily protein	-	7.3398
		GRMZM2G173729	RHO guanyl-nucleotide exchange factor 11	-	7.6032
