# Supplementary material for: Identification of Drought Tolerant Mechanisms in Maize Seedlings Based on Transcriptome Analysis of Recombination Inbred Lines
Source: Front Plant Sci. 2016 Jul 26;7:1080. doi: 10.3389/fpls.2016.01080 (PMC4961006; doi:10.3389/fpls.2016.01080)
Supplement: Supplementary file 19 [file Table10.xlsx]

## Sheet: Sheet1
	Supplemental Table S10. Maize drought stress gene expression for cell cycle related genes.Annotation source: Zea mays (MaizeSequence.org), Oryza sativa (Rice Genome Annotation Project), Arabidopsis thaliana (TAIR). The extent of differential expression is measured in terms of log2FoldChange change and hypen(-) indicates failure to meet the significance cutoff or undetected. Values in red and blue…
Stress stage	Gene Product Category	Gene	Annotation	RIL70(log2FoldChange)	RIL93(log2FoldChange)
DT2	Cyclins	GRMZM2G007130	CYCD5;1,cyclin d5;1	-	2.8425
		GRMZM2G160563	CYCP4;3,cyclin p4;3	-	-1.9555
		GRMZM2G470467	CYCD4;2,cyclin d4;2	-	-1.4199
	Cyclin Dependent Kinase	GRMZM2G416791	CDKB2;2,cyclin-dependent kinase B2;2	-	-1.51512
DT5	Cyclins related protein	GRMZM2G476685	Cyclin D1;1	-	-3.2452
		GRMZM2G133413	Cyclin D2;1	1.1969	-1.0142
		GRMZM2G075117	Cyclin D4;1	-	1.2219
		GRMZM2G470467	Cyclin D4;2	-	-1.5619
		GRMZM2G148621	Cyclin P2;1	-	-3.9203
		GRMZM2G021530	Cyclin P4;2	-	-4.0559
		GRMZM2G160563	Cyclin P4;3	-	-1.3082
		GRMZM2G106297	Cyclin family protein	-	-1.8888
		GRMZM2G117298	Cyclin family protein	-	-1.2958
		GRMZM2G463525	Cycling DOF factor 2	-	-1.4103
		GRMZM2G180836	Cyclin/Brf1-like TBP-binding protein	-	-2.6271
	Cyclin Dependent Kinase	GRMZM2G416791	Cyclin-dependent kinase B2;2	-	-1.0963
		GRMZM2G145879	Cyclin-dependent kinase D1;3	-	-1.1537
	Cyclin Dependent Kinase Inhibitor	GRMZM2G157510	inhibitor/interactor with cyclin-dependent kinase	-	1.5472
		GRMZM2G084570	inhibitor/interactor with cyclin-dependent kinase	-	1.1357
		GRMZM2G154414	Cyclin-dependent kinase inhibitor family protein	-1.1096	2.018
	Miscellaneous cell cycle products	GRMZM2G121753	RAD-like 1	-	-3.4764
		GRMZM2G133986	ATRAD9,RAD9	-	-1.1211
		GRMZM2G309109	ATMRE11,MRE11	-	-1.0119
